# Supplementary material for: Combined modality radiation therapy promotes tolerogenic myeloid cell populations and STAT3-related gene expression in head and neck cancer patients
Source: PubMed Central journal article supplement (PMC5834279; doi:10.18632/oncotarget.24397), 2018-02-02
Supplement: oncotarget-09-11279-s001.pdf [file oncotarget-09-11279-s001.pdf]

## Combined modality radiation therapy promotes tolerogenic myeloid cell populations and STAT3-related gene expression in head and neck cancer patients

### SUPPLEMENTARY MATERIALS

**Supplementary Table 1: Protocol schema**

| Pre-treatment | Radiation with concurrent chemotherapy or cetuximab |        |        |        |        |        |        | Follow-up period |         |
|---------------|-----------------------------------------------------|--------|--------|--------|--------|--------|--------|------------------|---------|
|               | Week 1                                              | Week 2 | Week 3 | Week 4 | Week 5 | Week 6 | Week 7 | Week 13          | Week 19 |
| B, N          | B                                                   | B, N   |        | B      |        | B      | B      | B                | B       |

Abbreviations: B, blood collection; N, lymph node biopsy.

Supplementary Table 2: Differential expression: week 2/baseline (Cytokine probe set)

| Probe label | Log2 fold change | P-value  |
|-------------|------------------|----------|
| NOD2        | 1.31             | 0.000655 |
| SPP1        | 4.07             | 0.00123  |
| VEGFA       | 2.67             | 0.00264  |
| IL2RB       | -0.477           | 0.00343  |
| IL6R        | 1.25             | 0.00393  |
| JAK3        | -1.13            | 0.00486  |
| IL1RN       | 3.98             | 0.0049   |
| IL12RB2     | -0.795           | 0.00689  |
| CCR5        | 1.35             | 0.00929  |
| FLT3LG      | -1               | 0.00956  |
| TYK2        | -0.701           | 0.00987  |
| TNFSF14     | 2.05             | 0.0152   |
| CCR1        | 1.62             | 0.0197   |
| IL10        | 2.42             | 0.0221   |
| IL8         | 2.22             | 0.0234   |
| TNFSF8      | 1.42             | 0.0246   |
| IFNL1       | -0.519           | 0.03     |
| HLA-DOB     | -1.15            | 0.0303   |
| TGFB1       | 0.8              | 0.0367   |
| IL5         | 0.862            | 0.0393   |
| LTB         | -1.11            | 0.0397   |
| IL4R        | 0.68             | 0.0404   |
| CCR4        | 0.745            | 0.0408   |
| IL1A        | 3.65             | 0.0446   |
| IL1B        | 2.56             | 0.05     |

Supplementary Table 3: Differential expression: week 2/baseline (Chemokine probe set)

| Gene     | Log2 fold change | P-value  |
|----------|------------------|----------|
| KLRB1    | -1.01            | 0.000678 |
| CX3CR1   | -2.26            | 0.00237  |
| CXCR2    | -1.15            | 0.0032   |
| TNFRSF1A | 1.03             | 0.00336  |
| TNFSF12  | -1.23            | 0.00353  |
| IL11RA   | -1.17            | 0.00582  |
| TNFRSF1B | 1.19             | 0.00824  |
| CCL7     | 6.01             | 0.00838  |
| IL32     | -1.75            | 0.00901  |
| CCRL2    | 2.6              | 0.0113   |
| CXCL16   | 0.956            | 0.0125   |
| CCL2     | 5.35             | 0.0147   |
| CCR3     | 2.3              | 0.0154   |
| C1QBP    | -0.578           | 0.0157   |
| CCR1     | 1.62             | 0.0197   |
| IFIT1    | 2.93             | 0.0208   |
| STAT3    | 0.559            | 0.021    |
| CXCL2    | 3.01             | 0.0232   |
| IL8      | 2.22             | 0.0234   |
| CCL20    | 3.68             | 0.0235   |
| CXCL3    | 4.22             | 0.0265   |
| CCL22    | 1.75             | 0.0407   |
| CCR4     | 0.745            | 0.0408   |
| CMKLR1   | -1.06            | 0.0408   |
| IFIT2    | 2.96             | 0.0446   |
| CCR7     | 1                | 0.045    |
| CCL8     | 2.79             | 0.0491   |
| TNFSF15  | 2.24             | 0.0499   |

Supplementary Table 4: Differential expression: wk 2/baseline (T cell function probe set)

| Gene    | Log2 fold change | P-value  |
|---------|------------------|----------|
| IL18RAP | -1.05            | 0.000281 |
| TP53    | -0.883           | 0.000321 |
| EGR1    | -1.61            | 0.00554  |
| CD86    | 0.794            | 0.00617  |
| IL12RB2 | -0.795           | 0.00689  |
| LCK     | -1.44            | 0.00694  |
| CCR5    | 1.35             | 0.00929  |
| DPP4    | -1.42            | 0.00941  |
| TNFSF14 | 2.05             | 0.0152   |
| CD3E    | -1.34            | 0.0176   |
| CD1C    | -1.45            | 0.0184   |
| CCR1    | 1.62             | 0.0197   |
| CD27    | -1.35            | 0.0244   |
| TBX21   | -0.825           | 0.0298   |
| MS4A1   | -1.06            | 0.0301   |
| IL18R1  | -0.787           | 0.0319   |
| IL5     | 0.862            | 0.0393   |
| IL4R    | 0.68             | 0.0404   |
| CCR4    | 0.745            | 0.0408   |

Supplementary Table 5: Differential expression: Wk 2/baseline (NK cell function)

| Gene    | Log2 fold change | P-value  |
|---------|------------------|----------|
| IL18RAP | -1.05            | 0.000281 |
| KLRB1   | -1.01            | 0.000678 |
| KLRF1   | -1.63            | 0.000734 |
| IL12RB2 | -0.795           | 0.00689  |
| KLRK1   | -0.839           | 0.0163   |
| CCR1    | 1.62             | 0.0197   |
| NCR1    | -0.743           | 0.0214   |
| KLRC2   | -0.807           | 0.0246   |
| KLRG1   | -1.38            | 0.0309   |
| IL18R1  | -0.787           | 0.0319   |

**Supplementary Table 6: House keeping genes used for normalization of gene expression**

---

**Gene Name**

---

Eef1g

Ppia

Rpl19

Abcf1

Sf3a3

Polr2a

Gusb

Oaz1

Sdha

Nubp1

Sap130

Hdac3

Alas1

G6pdx

Tubb5

Eif2b4

Polr1b

Edc3

Hprt

Tbp

---
